# Supplementary material
Source: publisher site journal article supplement (https://www.dovepress.com/article/279370)
Supplement: Supplementary file 1 [file get_supplementary_file.php]

**Supplementary Table 1** Nonzero coefficients in the LASSO-logistic regression model

| Genes | Character | Coefficient |
| --- | --- | --- |
| METTL14 | Writer | -0.3104466 |
| METTL16 | Writer | 0.2497452 |
| WTAP | Writer | 0.2261001 |
| KIAA1429 | Writer | 0.5311135 |
| ZC3H13 | Writer | 0.1448186 |
| RBM15 | Writer | 0.4333276 |
| ALKBH5 | Eraser | -0.1186324 |
| YTHDF1 | Reader | 0.3264817 |
| YTHDF2 | Reader | 0.1041577 |
| YTHDC1 | Reader | -0.3303012 |

**Supplementary Table 2** Basic information and clinical features of GC patients

| Variables |  | Patients  N=17 |
| --- | --- | --- |
| Gender | Female | 12 |
|  | Male | 5 |
| Age | ≤65years | 10 |
|  | >65years | 7 |
| Tumor Stage | I | 2 |
|  | II | 4 |
|  | III | 5 |
|  | IV | 6 |
| Tumor Grade | G1 | 4 |
|  | G2 | 5 |
|  | G3 | 8 |
| Metastasis | Yes | 10 |
|  | No | 7 |
| Smoking habit | Yes | 6 |
|  | No | 11 |
| Drinking alcohol habit | Yes | 3 |
|  | No | 14 |
| Drinking tea habit | Yes | 9 |
|  | No | 8 |
